# Supplementary material
Source: publisher figshare collection journal article supplement (https://springernature.figshare.com/ndownloader/files/18037070)
Supplement: Supplementary file 1 [file 18037070]

## Sheet: Table S3
Table S3: The QTLs of FS and WT in intraspecific upland cotton populations and interspecific Gh × Gb populations.
File	Map	QTL	Chromosome	Trait	LOD	R-sq	SimMap	Position	Left	Right
upland	consensusmap	qFS01.1	1	FS	3	9.2	N	43.3	42.1	51.6
upland	consensusmap	qFS-A1	1	FS	0	0	N	51.6	33	54
upland	consensusmap	qFS-chr1-1	1	FS	3.26	7.92	N	77.62	77.6	79.8
upland	consensusmap	qFS02.1	2	FS	2.5	6.1	N	53.3	51.9	54.7
upland	consensusmap	qFS03.1	3	FS	2.5	12.6	N	6.85	0	13.7
upland	consensusmap	qFS03.1	3	FS	3.3	9.9	N	41.1	35.1	49.7
upland	consensusmap	WT_3	3	Wall thickness	2.63	6	N	45.5	40	48
upland	consensusmap	qFS-3-1b	3	FS	3	11.9	N	57.35	46.5	68.2
upland	consensusmap	qFBS-c3	3	FS	4.02	5.1	N	76.04	58.3	81.2
upland	consensusmap	qFS-A3	3	FS	0	0	N	102	101.2	103.2
upland	consensusmap	qFS-c4	4	FS	5.18	11.39	N	45.4	0	0
upland	consensusmap	qFS04.1	4	FS	2.2	5.5	N	46.75	43	50.5
upland	consensusmap	qFS-C4-1	4	FS	3.6	7.2	N	86.31	83.3	88.3
upland	consensusmap	qFS-C4-2	4	FS	4.8	9.9	N	93.81	88.3	93.8
upland	consensusmap	qFS-C4-3	4	FS	3.3	6	N	107.81	104.2	109.5
upland	consensusmap	QTLFS7.f	5	FS	3.6	10.9	N	0	0	20.77
upland	consensusmap	QTLFS7.i	5	FS	3.68	10.89	N	0	0	20.77
upland	consensusmap	qVW-A5-1	5	FS	4.89	2.36	N	10.71	10.7	11.6
upland	consensusmap	qVW-A5-1	5	FS	4.6	6.27	N	14.21	13.3	14.8
upland	consensusmap	qFS05.1	5	FS	2.5	9.2	N	15.95	15.2	16.7
upland	consensusmap	qVW-A5-1	5	FS	3.02	1.65	N	16.71	16.7	17.8
upland	consensusmap	qFS-chr5-1	5	FS	4.27	9.99	N	26.91	14.9	31.3
upland	consensusmap	WT_5	5	Wall thickness	4.38	9.2	N	27	27	32
upland	consensusmap	qFBS-c5	5	FS	4.61	4.4	N	32.6	28.9	35.2
upland	consensusmap	qFS-chr5-1	5	FS	4.69	11.65	N	35.68	31.6	37.3
upland	consensusmap	QTLFS2.i	5	FS	3.14	8.36	N	38.4	36.99	44.01
upland	consensusmap	QTLFS2.i	5	FS	3.14	8.36	N	38.4	36.99	44.01
upland	consensusmap	TI_5	5	FS	5.96	13.9	N	61.4	59	62
upland	consensusmap	qFS05.1	5	FS	3.2	8	N	70.6	69.4	71.8
upland	consensusmap	qFS06.1	6	FS	4.5	18.9	N	0.65	0	1.3
upland	consensusmap	qFS-C6-1	6	FS	1.4	3	N	11.4	0	0
upland	consensusmap	qFS-C6-1	6	FS	1.41	2.51	N	11.41	0	11.4
upland	consensusmap	FS1-c6	6	FS	4.2	11	N	12.55	12.4	12.7
upland	consensusmap	qFS-c6	6	FS	3.1	6.25	N	39.02	0	0
upland	consensusmap	qFS-6-1	6	FS	3.62	7.95	N	45.27	0	0
upland	consensusmap	qFS-6-2	6	FS	3.02	8.19	N	45.27	0	0
upland	consensusmap	qFS-c6	6	FS	2.88	0.0747	N	50.29	0	0
upland	consensusmap	QTLFS8.e	7	FS	7.9	19.4	N	1	0	8
upland	consensusmap	QTLFS8.e	7	FS	7.9	19.4	N	1	0	8
upland	consensusmap	qFS-7-1	7	FS	7.17	8.38	N	1	0	17.59
upland	consensusmap	qFS-chr.7	7	FS	5.87	29.4	N	1.3	1.1	1.46
upland	consensusmap	qFS-A7-1c	7	FS	3.82	7.44	N	2.01	0	3.1
upland	consensusmap	qFS-A7-1d	7	FS	3.6	5.06	N	2.01	0	4.9
upland	consensusmap	qFS-A7-1b	7	FS	3.97	7.63	N	3.11	0	7
upland	consensusmap	qFS07.1	7	FS	2.8	9.1	N	3.75	0	7.5
upland	consensusmap	qFS-A7-1a	7	FS	3.3	4.1	N	4.91	3.1	7
upland	consensusmap	FS2-c7	7	FS	13.1	31.8	N	11.95	5.4	18.5
upland	consensusmap	qFS-C7-2	7	FS	4.87	2.79	N	12.19	1	16.8
upland	consensusmap	qFS07.1	7	FS	6.9	17.8	N	27	25.9	41.7
upland	consensusmap	qFS07.1	7	FS	7.1	16.6	N	29.7	25.7	33.7
upland	consensusmap	qFS-C7-1	7	FS	13.49	27.86	N	31.37	21.4	35.5
upland	consensusmap	qFS-C7-1	7	FS	11.8	22.6	N	31.61	21.7	31.6
upland	consensusmap	qFS-C7-2	7	FS	4	8.3	N	38.61	38.1	42.9
upland	consensusmap	qFS-A7-1	7	FS	4.45	2.41	N	41.01	41.2	41.3
upland	consensusmap	qFS-A7-1	7	FS	5.09	9.52	N	41.21	41.2	42
upland	consensusmap	qFS-A7-1	7	FS	3.62	4.3	N	41.21	41.2	41.3
upland	consensusmap	qFS-C7-3	7	FS	3.9	6.4	N	52.51	47.1	57.7
upland	consensusmap	qFS-C7-4	7	FS	3.2	8.6	N	74.11	64.1	76.8
upland	consensusmap	QTLFS3.i	8	FS	2.51	8.38	N	0	0	6.94
upland	consensusmap	QTLFS3.i	8	FS	2.51	8.38	N	0	0	6.94
upland	consensusmap	FS3.x	8	FS	3.29	42.1	N	0.1	0	6.94
upland	consensusmap	FS3.x	8	FS	3.29	42.1	N	0.1	0	6.94
upland	consensusmap	QTLFS7.f	8	FS	3.27	8.3	N	4.05	0	8.4
upland	consensusmap	QTLFS7.f	8	FS	3.27	8.3	N	4.05	0	8.4
upland	consensusmap	QTLFS4.i	8	FS	4.36	2.16	N	6	0	6.94
upland	consensusmap	QTLFS4.i	8	FS	4.36	2.16	N	6	0	6.94
upland	consensusmap	qFS-c8	8	FS	3.29	6.33	N	10.2	0	0
upland	consensusmap	qFS08.1	8	FS	4.1	17.2	N	10.25	7.9	12.6
upland	consensusmap	QTLFS5.i	8	FS	4.31	4.57	N	15.9	12.83	20.29
upland	consensusmap	QTLFS5.i	8	FS	4.31	4.57	N	15.9	12.83	20.29
upland	consensusmap	qFS-Pop1-A8-1	8	FS	2.53	0	N	26.33	0	0
upland	consensusmap	qFS-chr8-1	8	FS	3.28	8.91	N	34.52	34.5	44
upland	consensusmap	qFS08.1	8	FS	2.5	6.2	N	64.65	62.9	66.4
upland	consensusmap	qFS08.2	8	FS	2.7	6.8	N	71.15	70.2	72.1
upland	consensusmap	qFS-c9-1	9	FS	4.41	8.39	N	1.92	0	0
upland	consensusmap	qFS-A9-1	9	FS	8.46	9.37	N	2.61	2.6	4
upland	consensusmap	qFS-A9-1	9	FS	9.09	1.52	N	2.61	2.6	4
upland	consensusmap	qFS-A9-1	9	FS	4.87	6.21	N	2.61	2.6	4.9
upland	consensusmap	qFS09.1	9	FS	2.9	12.1	N	6.7	2.7	10.7
upland	consensusmap	qFS-c9-2	9	FS	4.04	8.52	N	13.52	0	0
upland	consensusmap	qFS-A9-1d	9	FS	5.28	6.07	N	14.81	8.8	24.8
upland	consensusmap	qFS-A9-1a	9	FS	6	11.37	N	16.81	8.8	24.8
upland	consensusmap	WT_9	9	Wall thickness	2.29	4	N	17	17	18
upland	consensusmap	qFS-A9-1b	9	FS	7.08	14.54	N	18.81	14.8	24.8
upland	consensusmap	qFS-A9-1c	9	FS	3.32	7.46	N	18.81	14.8	24.8
upland	consensusmap	qFS-F2:3-A9-1	9	FS	3.24	9.11	N	29.01	0	0
upland	consensusmap	QTLFS6.i	9	FS	2.53	1.5	N	33.4	32.92	35.22
upland	consensusmap	QTLFS6.i	9	FS	2.53	1.5	N	33.4	32.92	35.22
upland	consensusmap	qFS-C9-1	9	FS	4.1	10.5	N	36.01	23	38.9
upland	consensusmap	TI_9	9	FS	3.99	7.8	N	158.3	146	162
upland	consensusmap	FS2.t	10	FS	2.62	12.04	N	0	0	3.02
upland	consensusmap	FS2.t	10	FS	2.62	12.04	N	0	0	3.02
upland	consensusmap	qFS-10-1b	10	FS	3	9.5	N	1.45	0	2.9
upland	consensusmap	qFS10.2	10	FS	7.7	28.6	N	3.2	2.9	3.5
upland	consensusmap	qFS10.1	10	FS	2.6	10.1	N	12.8	12.4	13.2
upland	consensusmap	qFS-A10-1	10	FS	5.28	23.9	N	61.6	38.6	62.9
upland	consensusmap	qFS10.1	10	FS	6.7	16	N	91.05	80.1	102
upland	consensusmap	qFS-A11-1	11	FS	2.64	25.8	N	0	0	19
upland	consensusmap	FS1.u	11	FS	5.316	14.8	N	7.3	0	20.02
upland	consensusmap	FS1.u	11	FS	5.316	14.8	N	7.3	0	20.02
upland	consensusmap	qFS11.1	11	FS	2.9	5	N	9.75	8.9	10.6
upland	consensusmap	FS2.u	11	FS	5.003	13.4	N	13	0	20.02
upland	consensusmap	FS2.u	11	FS	5.003	13.4	N	13	0	20.02
upland	consensusmap	qFS-C11-1	11	FS	1.5	3.5	N	14.61	0	19.1
upland	consensusmap	qFS-A11-1a	11	FS	2.33	5.11	N	41.22	25.2	41.7
upland	consensusmap	qFS11.1	11	FS	3.3	8.1	N	88.05	85.7	90.4
upland	consensusmap	qFS-Chr11-1	11	FS	3.43	0.09	N	106.3	97.9	114.7
upland	consensusmap	qFS-F2-A12-1	12	FS	2.58	4.31	N	0.01	0	0
upland	consensusmap	FS2.x	12	FS	2.8	48.4	N	11.8	5.75	16.72
upland	consensusmap	FS2.x	12	FS	2.8	48.4	N	11.8	5.75	16.72
upland	consensusmap	qFS-A12-1	12	FS	3.62	11.1	N	25.95	0	36.8
upland	consensusmap	TI_12	12	FS	6.7	12.2	N	84.3	80	92
upland	consensusmap	qFS-C12-1	12	FS	1.3	3.1	N	114.81	74.3	123.2
upland	consensusmap	qFS-A12	12	FS	0	0	N	131.9	119.4	138.7
upland	consensusmap	qFS-c13	13	FS	4.06	8.67	N	35.94	0	0
upland	consensusmap	qFS-C13-1	13	FS	1.14	1.87	N	39.81	38.8	47
upland	consensusmap	qFS-C13-1	13	FS	3.69	6.87	N	40.74	32.7	50.4
upland	consensusmap	qFS-Pop2-A13-2	13	FS	2.83	0	N	56.29	0	0
upland	consensusmap	qFS-C13-2	13	FS	3.32	6.05	N	65.51	54.4	70.8
upland	consensusmap	FS3.y	13	FS	3.28	6.29	N	70.6	69.97	76.41
upland	consensusmap	FS3.y	13	FS	3.28	6.29	N	70.6	69.97	76.41
upland	consensusmap	qFS-chr13-1	13	FS	8.22	22.08	N	140.49	132.2	145.6
upland	consensusmap	qFS-c14-1	14	FS	3.02	5.69	N	9.81	0	0
upland	consensusmap	qFS-D2-1	14	FS	2.75	6.94	N	10.01	0	13.4
upland	consensusmap	qFS-D2-1	14	FS	8.12	14.4	N	14.8	10.4	14.8
upland	consensusmap	qFS14.1	14	FS	2.4	5.9	N	14.9	1.3	28.5
upland	consensusmap	qFBS-c14h	14	FS	8.18	8.4	N	16.38	15.1	19.5
upland	consensusmap	qFBS-c14h	14	FS	8.18	8.4	N	16.38	0	0
upland	consensusmap	qFS-c14-2	14	FS	2.56	4.86	N	17.91	0	0
upland	consensusmap	qFS-C14-1	14	FS	2.5	6.4	N	19.51	17.5	22.9
upland	consensusmap	qFS-C14-2	14	FS	2	4.2	N	24.81	23.8	28.7
upland	consensusmap	qFS-C14-3	14	FS	3.4	5.9	N	31.71	30.1	34.3
upland	consensusmap	qFS-C14-4	14	FS	3.1	5.4	N	37.31	36.3	40.2
upland	consensusmap	qFS14.1	14	FS	3.2	9.8	N	43.4	41.9	44.9
upland	consensusmap	FSQTL1.b	14	FS	2.5	14.62	N	44.16	30.7	53.5
upland	consensusmap	FSQTL1.b	14	FS	2.5	14.62	N	44.16	30.7	53.5
upland	consensusmap	qFS-C14-5	14	FS	3.5	6.8	N	46.81	43.3	47.8
upland	consensusmap	qFS14.1	14	FS	2.8	6.9	N	48.5	39.1	57.9
upland	consensusmap	qFS-F2:3-D1-2	14	FS	2.76	6.07	N	52.41	0	0
upland	consensusmap	qFS-F2:3-D1-1#	14	FS	4.09	3.78	N	85.81	0	0
upland	consensusmap	qFS-Chr14-1	14	FS	4.33	0.2809	N	171.6	171.3	171.9
upland	consensusmap	qFS-c15	15	FS	4.05	8.41	N	0.01	0	0
upland	consensusmap	qFS-chr15-1	15	FS	3.06	5.64	N	4.71	4.5	6.9
upland	consensusmap	qFS15.1	15	FS	3.3	18.4	N	13.3	0	26.6
upland	consensusmap	qFS-c15	15	FS	4.58	0.1203	N	15.72	0	0
upland	consensusmap	qFS-D1-1	15	FS	0	0	N	53.5	17.3	55.6
upland	consensusmap	qFS-D1-2	15	FS	0	0	N	57	55.6	58.5
upland	consensusmap	QTLFS1.i	15	FS	2.71	7.56	N	81.4	79.3	88.7
upland	consensusmap	QTLFS1.i	15	FS	2.71	7.56	N	81.4	79.3	88.7
upland	consensusmap	qTI-C16-1	16	FS	2.08	11.1	N	0	0	3
upland	consensusmap	QTLFS10.f	16	FS	2.91	14	N	3.97	0	15
upland	consensusmap	QTLFS10.f	16	FS	2.91	14	N	3.97	0	15
upland	consensusmap	qFS16.1	16	FS	2.4	5.9	N	5	0	10
upland	consensusmap	qFS-16-1b	16	FS	3	10.2	N	5.25	0	10.5
upland	consensusmap	TI_16	16	FS	3.63	5	N	11.6	11.6	12
upland	consensusmap	qFS-16-1c	16	FS	3	7.3	N	21.15	0	42.3
upland	consensusmap	qFS16.1	16	FS	3.8	9.2	N	25.9	25.1	26.7
upland	consensusmap	QTLFS9.f	16	FS	2.18	13.2	N	28.11	5.3	30.8
upland	consensusmap	QTLFS9.f	16	FS	2.18	13.2	N	28.11	5.3	30.8
upland	consensusmap	qFS-D3-1	16	FS	5.46	14.71	N	66.71	66.7	69.2
upland	consensusmap	qFS-D3-1	16	FS	14.58	2.11	N	67.21	66.7	67.5
upland	consensusmap	qFS-D3-1	16	FS	11.24	5.23	N	67.21	66.7	67.5
upland	consensusmap	qFS-D3-1	16	FS	7.21	4.72	N	71.21	70.4	72
upland	consensusmap	qFS16.2	16	FS	2.8	6.9	N	201.4	194.5	208.3
upland	consensusmap	QTLFS8.f	17	FS	2.43	5	N	0	0	63.94
upland	consensusmap	QTLFS8.f	17	FS	2.43	5	N	0	0	63.94
upland	consensusmap	qFS-chr17-1	17	FS	3.61	8.45	N	0.01	0	19
upland	consensusmap	qFS-D3-1f	17	FS	3.37	8.74	N	11.01	0	14.1
upland	consensusmap	qFS-D3-1d	17	FS	7.09	17.55	N	12.01	0	23.5
upland	consensusmap	qFS-D3-1e	17	FS	4.11	7.15	N	14.01	0	23.5
upland	consensusmap	qFS-D3-1b	17	FS	3.23	4.51	N	14.11	0	23.5
upland	consensusmap	qFS-D3-1a	17	FS	6.2	8.15	N	14.41	14.1	23.5
upland	consensusmap	qFS-D3-1c	17	FS	3.99	4.54	N	14.41	0	23.5
upland	consensusmap	qFS-D3-1g	17	FS	2.83	6.1	N	16.41	14.1	23.5
upland	consensusmap	qFS-c17	17	FS	4.93	9.82	N	35.24	0	0
upland	consensusmap	WT_18	18	Wall thickness	2.65	4.8	N	0	0	5
upland	consensusmap	qFS-C18-3	18	FS	1.3	2	N	0.01	0	10.9
upland	consensusmap	qFS-D13-1	18	FS	3.91	9.7	N	9	0	31.6
upland	consensusmap	qFS-C18-1	18	FS	2.78	2.39	N	17.7	1.7	18.7
upland	consensusmap	qFS-chr18-2	18	FS	3.29	9.78	N	19.66	11.6	28
upland	consensusmap	qFS18.1	18	FS	3.7	14.1	N	22.45	20.5	24.4
upland	consensusmap	qFS18.1	18	FS	5.1	12.3	N	33.55	32.9	34.2
upland	consensusmap	qFS18.1	18	FS	2.7	6.7	N	47.65	45.8	49.5
upland	consensusmap	qFS-chr18-1	18	FS	2.36	6.33	N	52.2	44.2	57.4
upland	consensusmap	qFS-D13	18	FS	0	0	N	55.1	49.5	67.4
upland	consensusmap	qFS-C18-1	18	FS	1.12	1.8	N	62.41	60.4	64.9
upland	consensusmap	QTLFS2.l	18	FS	2.6	24.5	N	68.9	65.6	72.5
upland	consensusmap	QTLFS2.l	18	FS	2.6	24.5	N	68.9	65.6	72.5
upland	consensusmap	qFS-C18-2	18	FS	1.5	2.7	N	73.41	68.7	80.4
upland	consensusmap	QTLFS1.l	18	FS	3.8	33	N	77.14	76.56	80.74
upland	consensusmap	QTLFS1.l	18	FS	3.8	33	N	77.14	76.56	80.74
upland	consensusmap	qFS-Chr18-1	18	FS	2.67	0.048	N	92.65	77.7	107.6
upland	consensusmap	qFS-F2-D5-1	18	FS	4.4	7.36	N	93.41	0	0
upland	consensusmap	FS4.t	18	FS	3.26	13.3	N	100.3	98.13	103.17
upland	consensusmap	FS4.t	18	FS	3.26	13.3	N	100.3	98.13	103.17
upland	consensusmap	qFS19.1	19	FS	3.2	15.9	N	2.5	0	5
upland	consensusmap	qFS-D5-1	19	FS	2.08	6	N	4	0	24.8
upland	consensusmap	FS5.y	19	FS	2.52	5.9	N	15.52	13.46	25.04
upland	consensusmap	FS5.y	19	FS	2.52	5.9	N	15.52	13.46	25.04
upland	consensusmap	qFS-C19-1	19	FS	4.41	9.3	N	20.71	11.7	27.7
upland	consensusmap	qFSchr19-1	19	FS	4.61	15.54	N	40.51	34.5	82.8
upland	consensusmap	qFS-D5-1	19	FS	0	0	N	43.4	25.6	44.8
upland	consensusmap	qFS-Chr19-1	19	FS	3.33	0.1089	N	58.65	34.5	82.8
upland	consensusmap	qFS19.1	19	FS	2.2	5.4	N	101.7	100.5	102.9
upland	consensusmap	qFS-D5-2	19	FS	0	0	N	163.6	130.9	166.8
upland	consensusmap	qFS20.1	20	FS	2.8	7	N	2.1	0	4.2
upland	consensusmap	TI_20	20	FS	2.73	4.3	N	47.6	38	49
upland	consensusmap	qFS-D11-1	21	FS	2.58	5	N	0	0	10.8
upland	consensusmap	QTLFS9.e	21	FS	3.6	8.9	N	0	0	0.6
upland	consensusmap	QTLFS9.e	21	FS	3.6	8.9	N	0	0	0.6
upland	consensusmap	qFS-c21-2	21	FS	2.52	5.9	N	2.01	0	0
upland	consensusmap	qFS-c21-3	21	FS	3.83	7.94	N	5.26	0	0
upland	consensusmap	qFS21.1	21	FS	2.7	9.9	N	12	9.9	14.1
upland	consensusmap	qFS-c21-1	21	FS	2.92	5.9	N	28.71	0	0
upland	consensusmap	qFS-C21-1	21	FS	3.2	6	N	61.4	0	0
upland	consensusmap	qFS-C21-1	21	FS	3.22	6.02	N	61.41	58.4	65.1
upland	consensusmap	FS1.x	21	FS	2.73	25.9	N	64.1	60.46	70.25
upland	consensusmap	FS1.x	21	FS	2.73	25.9	N	64.1	60.46	70.25
upland	consensusmap	qFS21.2	21	FS	5.2	25.1	N	68.95	65.6	72.3
upland	consensusmap	qFS-C21-2	21	FS	4.6	8	N	72.4	0	0
upland	consensusmap	qFS-C21-2	21	FS	4.59	7.74	N	72.41	70.6	72.4
upland	consensusmap	qFS-Chr21-2	21	FS	3.98	0.1296	N	180.7	173.6	187.8
upland	consensusmap	qFS22.1	22	FS	5.71	8.07	N	33.2	0	0
upland	consensusmap	FS2.z	23	FS	2.58	4.85	N	0.01	0	4.95
upland	consensusmap	FS2.z	23	FS	2.58	4.85	N	0.01	0	4.95
upland	consensusmap	qFS-23-1b	23	FS	3	9	N	6.95	0	13.9
upland	consensusmap	qFS-C23-1	23	FS	13.85	11.76	N	13.71	0	15.5
upland	consensusmap	qFS-C23-2	23	FS	17.13	8.41	N	26.71	19.5	26.7
upland	consensusmap	qFS23.1	23	FS	2.7	6.7	N	36	34.2	37.8
upland	consensusmap	qFS-C23-3	23	FS	12.41	14.08	N	43.41	41.4	47.8
upland	consensusmap	qFS-D9-1	23	FS	3.86	9.3	N	43.84	39.8	45.9
upland	consensusmap	qFS-C23-4	23	FS	12.31	5.57	N	50.31	48.6	52.1
upland	consensusmap	QTLFS5.l	23	FS	2.9	42.1	N	60.8	55.64	70.9
upland	consensusmap	QTLFS5.l	23	FS	2.9	42.1	N	60.8	55.64	70.9
upland	consensusmap	qFS-23-1	23	FS	3	11.2	N	62.75	53.9	71.6
upland	consensusmap	FSQTL1.b	23	FS	3.04	5.32	N	65.74	56.2	65.9
upland	consensusmap	FSQTL1.b	23	FS	3.04	5.32	N	65.74	56.2	65.9
upland	consensusmap	FSQTL1.b	23	FS	3.01	5.31	N	67.82	65.9	67.9
upland	consensusmap	FSQTL1.b	23	FS	3.01	5.31	N	67.82	65.9	67.9
upland	consensusmap	FSQTL1.b	23	FS	4.23	9.11	N	74.87	68.4	77.7
upland	consensusmap	FSQTL1.b	23	FS	4.23	9.11	N	74.87	68.4	77.7
upland	consensusmap	QTLFS4.l	23	FS	2.9	14.3	N	84.6	77.75	85.89
upland	consensusmap	QTLFS4.l	23	FS	2.9	14.3	N	84.6	77.75	85.89
upland	consensusmap	FS1.y	23	FS	3.77	10.29	N	92.9	88.27	96.42
upland	consensusmap	FS2.y	23	FS	2.86	6.54	N	92.9	88.27	96.42
upland	consensusmap	FS1.y	23	FS	3.77	10.29	N	92.9	88.27	96.42
upland	consensusmap	FS2.y	23	FS	2.86	6.54	N	92.9	88.27	96.42
upland	consensusmap	qFS23.1	23	FS	3	32	N	159.5	148.8	161.9
upland	consensusmap	qFS-F2:3-BES-1c	24	FS	12.46	9.4	N	1.71	0.4	2.71
upland	consensusmap	QTLFS11.f	24	FS	2.33	8	N	2	0	5.3
upland	consensusmap	QTLFS11.f	24	FS	2.33	8	N	2	0	5.3
upland	consensusmap	qFS-F2-JES-1c	24	FS	8.36	6.3	N	2.71	0.4	3.56
upland	consensusmap	qFS-F2:3-JES-1c	24	FS	2.52	4.2	N	2.71	0.4	3.25
upland	consensusmap	qFBS-c24h	24	FS	13.44	15.7	N	3.29	0.7	3.3
upland	consensusmap	qFS-F2:3-BES-3a	24	FS	25.32	14.8	N	3.36	3.15	3.97
upland	consensusmap	qFS-F2:3-JES-3a	24	FS	5.76	7.4	N	3.55	3.31	3.97
upland	consensusmap	qFS-F2:3-BES-2a	24	FS	29.76	13.4	N	4.28	3.97	5.13
upland	consensusmap	qFS-F2:3-JES-2a	24	FS	6.11	7	N	4.56	3.97	5.66
upland	consensusmap	qFS-F2-JES-2a	24	FS	4.84	6.5	N	4.56	3.55	5.66
upland	consensusmap	qFS-F2:3-BES-2c	24	FS	12.08	8	N	5.01	3.72	6.13
upland	consensusmap	qFS-F2-JES-2c	24	FS	8.64	6.5	N	5.41	3.72	6.13
upland	consensusmap	qFS-24-1	24	FS	3.07	8.73	N	6.41	0	0
upland	consensusmap	qFS24.1	24	FS	5.1	16.2	N	6.5	0	9.3
upland	consensusmap	QTLFS12.f	24	FS	2.87	6.1	N	8	0	18.2
upland	consensusmap	QTLFS12.f	24	FS	2.87	6.1	N	8	0	18.2
upland	consensusmap	qFS-F2:3-BES-3b	24	FS	13.4	10.5	N	8.15	4	9.15
upland	consensusmap	qFS-F2-JES-3c	24	FS	7.54	5.7	N	8.26	7.06	10.06
upland	consensusmap	qFS-F2:3-BES-1a	24	FS	28.82	13.6	N	8.42	7.38	8.73
upland	consensusmap	qFS-F2:3-BES-3c	24	FS	11.48	9.8	N	8.42	7.47	9.42
upland	consensusmap	qFS-F2:3-JES-1a	24	FS	5.25	7.8	N	8.97	7.38	9.2
upland	consensusmap	qFS-F2-JES-1a	24	FS	4.49	5.8	N	8.97	7.38	9.2
upland	consensusmap	qFS-F2:3-JES-2b	24	FS	3.48	5	N	10.15	8.15	11.23
upland	consensusmap	qFS-F2-JES-2b	24	FS	3.44	5.4	N	10.15	7.15	11.01
upland	consensusmap	qFS-F2:3-BES-2b	24	FS	14.8	11.2	N	11.01	10.15	12.07
upland	consensusmap	qFS-F2:3-BES-1b	24	FS	14.5	12.9	N	12.88	12.48	14.3
upland	consensusmap	qFS-F2:3-JES-1b	24	FS	3.85	6.8	N	14.3	13.37	17.15
upland	consensusmap	qFS-F2-JES-1b	24	FS	4.02	7.5	N	14.3	13.37	17.15
upland	consensusmap	qFS-C24-1	24	FS	2.96	4.6	N	16.01	0	21
upland	consensusmap	QTLFS14.f	24	FS	3.3	10.5	N	16.1	8.1	24.5
upland	consensusmap	QTLFS14.f	24	FS	3.3	10.5	N	16.1	8.1	24.5
upland	consensusmap	qFS-c24	24	FS	2.68	5.67	N	23.88	0	0
upland	consensusmap	QTLFS13.f	24	FS	3	42.4	N	23.9	22.4	24.9
upland	consensusmap	QTLFS13.f	24	FS	3	42.4	N	23.9	22.4	24.9
upland	consensusmap	qFS24.1	24	FS	6.2	14.8	N	31	27.5	34.5
upland	consensusmap	qFS24.2	24	FS	5	14.8	N	62.9	61.5	67.1
upland	consensusmap	qFS-chr24-1	24	FS	3.03	9.51	N	99.98	88	109.2
upland	consensusmap	qFS24.3	24	FS	4.1	10.8	N	111.3	111.1	118.9
upland	consensusmap	qFS24.4	24	FS	5.2	13.1	N	141.8	137.4	151.4
upland	consensusmap	qFS24.5	24	FS	5.9	32.6	N	188.6	180.9	188.6
upland	consensusmap	qFS25.2	25	FS	2.6	10.2	N	3.1	0	6.2
upland	consensusmap	qFS-D6-1	25	FS	0	0	N	10.1	0	15.7
upland	consensusmap	qFS-C25-1a	25	FS	12.6	19.12	N	32.11	16.2	35.4
upland	consensusmap	qFS25.1	25	FS	5.6	18.9	N	32.7	29.8	35.6
upland	consensusmap	qFS-chr25-1	25	FS	2.78	5.17	N	33.91	0	0
upland	consensusmap	qFS-chr25-1	25	FS	2.78	5.17	N	33.91	33.1	34.2
upland	consensusmap	qFS-C25-1b	25	FS	10.95	21.36	N	40.45	35.6	62.2
upland	consensusmap	qFS-chr25-8	25	FS	0	8.81	N	41.61	40.6	42.3
upland	consensusmap	qFS-chr25-2	25	FS	3.24	7.28	N	44.01	0	0
upland	consensusmap	qFS-chr25-2	25	FS	3.24	7.28	N	44.01	43.8	44.1
upland	consensusmap	qFS-chr25-9	25	FS	0	6.61	N	45.01	45	45.2
upland	consensusmap	qFS-chr25-3	25	FS	4.72	8.76	N	47.01	0	0
upland	consensusmap	qFS-chr25-3	25	FS	4.72	8.76	N	47.01	46.8	47.1
upland	consensusmap	qFS-chr25-4	25	FS	3.52	6.53	N	48.31	0	0
upland	consensusmap	qFS-chr25-4	25	FS	3.52	6.53	N	48.31	48.3	50.5
upland	consensusmap	qFS-chr25-5	25	FS	4.18	8.39	N	51.11	0	0
upland	consensusmap	qFS-chr25-5	25	FS	4.18	8.39	N	51.11	51.1	51.7
upland	consensusmap	qFS-chr25-6	25	FS	3.77	7.29	N	54.01	0	0
upland	consensusmap	qFS-chr25-6	25	FS	3.77	7.29	N	54.01	52.7	54.5
upland	consensusmap	qFS-chr25-10	25	FS	0	6.32	N	55.11	55.1	56
upland	consensusmap	qFS-chr25-11	25	FS	0	5.4	N	58.11	58.1	58.3
upland	consensusmap	qFS-chr25-12	25	FS	0	5.49	N	60.41	59.4	61.3
upland	consensusmap	qFS-chr25-13	25	FS	0	9.37	N	64.01	63.8	64.7
upland	consensusmap	qFS-chr25-7	25	FS	2.73	5.6	N	69.81	0	0
upland	consensusmap	qFS-chr25-7	25	FS	2.73	5.6	N	69.81	69.6	72.9
upland	consensusmap	FS5.t	25	FS	3.01	19.51	N	94.3	89.6	97.93
upland	consensusmap	FS5.t	25	FS	3.01	19.51	N	94.3	89.6	97.93
upland	consensusmap	qFS-C25-1	25	FS	2.97	5.39	N	109.51	108.4	110.8
upland	consensusmap	qFS-C25-2	25	FS	3.84	8.13	N	120.51	119.3	123.4
upland	consensusmap	qFS-C25-3	25	FS	10.6746	17	N	125.1	0	0
upland	consensusmap	qFS-C25-3	25	FS	10.67	17	N	125.11	125	126.3
upland	consensusmap	qFS-D6-2	25	FS	0	0	N	128.7	121.9	128.7
upland	consensusmap	qFS-C25-4	25	FS	5.9	12	N	130.8	0	0
upland	consensusmap	qFS-C25-4	25	FS	5.88	11.59	N	130.81	130.6	131.5
upland	consensusmap	qFS-C25-5	25	FS	3.07	5.43	N	135.81	135.8	136.5
upland	consensusmap	qFS-C25-6	25	FS	4.21	8.51	N	137.81	137.7	138.1
upland	consensusmap	qFS-C25-7	25	FS	3.98	10.2	N	147.81	144.8	149.4
upland	consensusmap	qFS26.1	26	FS	2.7	8.7	N	11.9	9.1	14.7
upland	consensusmap	TI_26	26	FS	10.05	13.7	N	26.3	26	58
upland	consensusmap	qFS-c26-1	26	FS	3.12	6.09	N	35.62	0	0
upland	consensusmap	qFS-c26-2	26	FS	2.59	4.88	N	41.71	0	0
inter	consensusmap	FS1	1	FS	0.73	13.4	N	21.7	17.48	26.23
inter	consensusmap	TC-qFS-c1-1	1	FS	9.36	14.9	N	75.7	75.5	80.5
inter	consensusmap	TC-qFS-c1-2	1	FS	4.98	14.3	N	86.9	82.6	89.3
inter	consensusmap	FS1	1	FS	0.91	12.4	N	97.3	95.99	101.5
inter	consensusmap	q-STR-1-1	1	FS	0	12.56	N	169.1	150.9	169.1
inter	consensusmap	q-STR-2-1	2	FS	0	12.17	N	4.7	4.6	4.8
inter	consensusmap	qFS-c2-1	2	FS	3.86	7.3	N	63	58.4	67.6
inter	consensusmap	qFS3-2	3	FS	4.5	16.55	N	1.8	0	3.3
inter	consensusmap	qFS3-1	3	FS	2.71	10.84	N	14.2	6.8	15.3
inter	consensusmap	BC1_STR_3_1_4.94_[-]	3	FS	4.9	18	N	62.6	42.6	82.6
inter	consensusmap	BC1_STR_3_2_5.70_[-]	3	FS	5.7	20	N	73	55.3	90.8
inter	consensusmap	STR-C3	3	FS	4.51	16.2	N	90	85	95
inter	consensusmap	F2-qFS-c4-1	4	FS	3.5	12.37	N	8.01	0	18
inter	consensusmap	Mp8_STR_4_1_3.95_[+]	4	FS	3.9	16	N	63.6	56	69.7
inter	consensusmap	qTL-FS-E3-Chr4	4	FS	0	12.5766	N	104.172	94.6	113.8
inter	consensusmap	qFS-A5-1	5	FS	5.93	2.89	N	26.14	24.4	30.5
inter	consensusmap	qFS-A5-1	5	FS	4.03	4.04	N	39.72	27.3	46.7
inter	consensusmap	BC1_STR_5_3_3.98_[-]	5	FS	4	13	N	60.7	34.3	87.1
inter	consensusmap	q-STR-5-1	5	FS	0	14.3	N	77.3	64.2	92.1
inter	consensusmap	STR-1-C5	5	FS	5.61	21.3	N	101	88.5	113.5
inter	consensusmap	qFS5-1	5	FS	3.54	13.14	N	198.7	196.6	219.2
inter	consensusmap	STR-2-C5	5	FS	2.53	4.4	N	334	321.5	346.5
inter	consensusmap	qTL-FS-E4-Chr6	6	FS	0	31.4269	N	150.9	137.4	160.3
inter	consensusmap	q-STR-6-1	6	FS	0	16.69	N	167.3	167.2	190.4
inter	consensusmap	qFS-A7-1	7	FS	4.92	2.45	N	0	0	9.27
inter	consensusmap	Mp7_STR_7_4_5.22_[+]	7	FS	5.2	15	N	24.5	18.7	30.3
inter	consensusmap	qFS-c7-1	7	FS	12.52	26.21	N	56.7	48.7	66.2
inter	consensusmap	qFS-c7-2	7	FS	11.73	27.09	N	76.2	66.2	85.1
inter	consensusmap	q-STR-7-1	7	FS	0	14.04	N	85.9	84.8	100.8
inter	consensusmap	F2-qFS-c7-1	7	FS	5.13	14.36	N	137.72	134.2	141.2
inter	consensusmap	qFS-A8-1	8	FS	3.26	3.38	N	20.2	0	21.5
inter	consensusmap	qFS-A8-1	8	FS	15.61	7.66	N	37.06	21.465	56.22
inter	consensusmap	FSA02	8	FS	3.33	5	N	99.1	85.26	102.73
inter	consensusmap	F2:3-qFS-c8-1	8	FS	3.03	12.9	N	201.2	181.2	201.2
inter	consensusmap	Ge6_STR_9_1_3.72_[+]	9	FS	3.7	12	N	20.3	2.4	38.2
inter	consensusmap	qTL-FS-E3-Chr9	9	FS	0	13.0642	N	135.298	124.2	144.9
inter	consensusmap	qTL-FS-E4-Chr10	10	FS	0	16.8367	N	0	0	10.7
inter	consensusmap	qFS-A10-1	10	FS	3	2.45	N	16.46	2.3	27.2
inter	consensusmap	qTL-FS-E3-Chr10	10	FS	0	25.598	N	60.84	52.4	69.3
inter	consensusmap	qFS-07W-c11-1	11	FS	3.22	14.95	N	2.3	0	4.6
inter	consensusmap	qFS-07X-c11-1	11	FS	2.7	14.42	N	2.3	0	4.6
inter	consensusmap	qFS-c11-1	11	FS	4	8.9	N	12.9	9.5	14.5
inter	consensusmap	qFS-A11-1	11	FS	5.82	2.73	N	16.85	16.8	17.2
inter	consensusmap	qFS-A11-2	11	FS	5.93	3.12	N	119.17	118	121.4
inter	consensusmap	qTL-FS-E1-Chr11	11	FS	0	21	N	204.42	193.1	216.2
inter	consensusmap	qTL-FS-E2-Chr11	11	FS	0	21	N	204.42	193.1	216.2
inter	consensusmap	q-STR-11-1	11	FS	0	29.22	N	234.7	224.2	245.2
inter	consensusmap	qFS-A12-1	12	FS	14.53	7.33	N	0	0	17.072
inter	consensusmap	qFS-A12-1	12	FS	3.27	3.38	N	11.15	0	32.5
inter	consensusmap	Lu7_STR_12_1_4.41_[+]	12	FS	4.4	13	N	34.2	24.9	43.6
inter	consensusmap	Ge6_STR_12_1_7.17_[+]	12	FS	7.2	31	N	38.5	31.7	45.4
inter	consensusmap	qFS-A12-2	12	FS	4.61	2.07	N	84.93	78.3	99.05
inter	consensusmap	TC-qFS-c12-1	12	FS	3.85	11.97	N	88.11	85.4	91.5
inter	consensusmap	q-STR-12-1	12	FS	0	16.32	N	235.3	228.4	235.3
inter	consensusmap	qFS-13-1	13	FS	3.9	5.8	N	7.6	6.7	8.5
inter	consensusmap	Mp8_STR_14_1_3.84_[-]	14	FS	3.8	15	N	56.5	48.2	64.8
inter	consensusmap	qFS-D2-1	14	FS	5.79	3.23	N	62.16	61	64
inter	consensusmap	FS14	14	FS	6.22	4.4	N	104.7	99.62	107.03
inter	consensusmap	F2-qFS-c14-1	14	FS	4.15	10.2	N	123.5	122.5	125
inter	consensusmap	F2-qFS-c14-2	14	FS	3.97	12.13	N	167	164.5	170.7
inter	consensusmap	qFS-D1-1	15	FS	5.08	2.4	N	54.7	47.08	62.31
inter	consensusmap	qFS-D1-3	15	FS	3.23	3.34	N	57.87	54.7	67.7
inter	consensusmap	Ge6_STR_15_1_4.85_[-]	15	FS	4.9	17	N	68.2	55.7	71.7
inter	consensusmap	qFS-D1-5	15	FS	3.13	3.19	N	100.62	99.7	104.9
inter	consensusmap	qFS16-1	16	FS	3.52	11.97	N	18.4	14	21.1
inter	consensusmap	qFS16-2	16	FS	3.67	14.5	N	24.1	21.1	27.5
inter	consensusmap	BC2S1_STR_16_1_3.38_[-]	16	FS	3.4	8	N	44.8	27.6	62
inter	consensusmap	STR-C16	16	FS	2.63	5.4	N	65	42	72
inter	consensusmap	F2:3-qFs-c16-1	16	FS	4.02	1	N	68.5	64.5	69.5
inter	consensusmap	F2:3-qFS-c16-2	16	FS	4.16	1	N	88.5	82.4	91.3
inter	consensusmap	qFS-D7-1	16	FS	3.87	2.13	N	121.47	121	129
inter	consensusmap	qFS-18-1	18	FS	5	4.3	N	14.75	13.8	15.7
inter	consensusmap	F2-qFS-c18-1	18	FS	2.53	3.1	N	18.2	15.9	24.5
inter	consensusmap	qFS-18-2	18	FS	4.4	4	N	19.9	18	21.8
inter	consensusmap	STR-1-C18	18	FS	3.2	11.8	N	53	40	70
inter	consensusmap	BC2_STR_18_1_4.03_[+]	18	FS	4	9	N	90.7	76.5	105
inter	consensusmap	STR-2-C18	18	FS	3.19	5.6	N	108	98	118
inter	consensusmap	Lu7_STR_19_1_7.36_[+]	19	FS	7.4	27	N	6	1.6	10.5
inter	consensusmap	Lu7_STR_19_4_5.93_[+]	19	FS	5.9	19	N	37.9	31.5	44.3
inter	consensusmap	q-STR-19-1	19	FS	0	11.7	N	113	107.2	115.8
inter	consensusmap	q-STR-19-1	19	FS	0	12.74	N	192.7	169.4	218.9
inter	consensusmap	qFS20-1	20	FS	3.13	11.01	N	1.8	0	7
inter	consensusmap	qFS-07A-c20-1	20	FS	3.25	12.21	N	57.75	41.7	73.8
inter	consensusmap	Mp7_STR_21_1_3.34_[-]	21	FS	3.3	9	N	32.9	23.3	42.6
inter	consensusmap	Lu8_STR_21_3_7.47_[-]	21	FS	7.5	28	N	62.3	59.1	65.5
inter	consensusmap	QFS-D11-1	21	FS	10.8	23.4	N	102	97.5	107.1
inter	consensusmap	qFS-08A-c21-1	21	FS	2.72	8.38	N	111.55	108.8	114.3
inter	consensusmap	FSD02	21	FS	3.79	12.3	N	117.6	111.86	118.96
inter	consensusmap	qFS-D11-1	21	FS	4.41	3.7	N	139.34	118.84	159.14
inter	consensusmap	STR-D02	21	FS	4.05	13.3	N	193	190	210
inter	consensusmap	q-STR-22-1	22	FS	0	18.34	N	23.9	0	33.2
inter	consensusmap	qFS22-1	22	FS	2.9	10.44	N	42.4	39.5	45.5
inter	consensusmap	q-STR-22-2	22	FS	0	18.03	N	49.4	39.6	63.9
inter	consensusmap	q-STR-23-1	23	FS	0	8.74	N	50.8	35.1	54.1
inter	consensusmap	STR-1-C23	23	FS	4.78	12.2	N	57	60	80
inter	consensusmap	F2:3-qFS-c23-1	23	FS	2.95	2.71	N	80.2	75.2	82.4
inter	consensusmap	TC-qFS-c23-1	23	FS	5.09	16.2	N	80.2	74.7	82.4
inter	consensusmap	TC-qFS-c23-2	23	FS	4.88	15.4	N	85.5	82.4	87.5
inter	consensusmap	qTL-FS-E4-Chr23	23	FS	0	12.4197	N	87.5	77.3	96.9
inter	consensusmap	qFS-D9-1	23	FS	6.84	3.3	N	89.85	30.4	90.4
inter	consensusmap	BC1_STR_23_2_4.34_[-]	23	FS	4.3	15	N	98.4	74.5	122.3
inter	consensusmap	BC2_STR_23_4_4.05_[-]	23	FS	4.1	7	N	100.3	81.1	119.5
inter	consensusmap	STR-2-C23	23	FS	2.86	5	N	125	124	126
inter	consensusmap	qFS-D9-2	23	FS	3.76	2.08	N	155.01	107	159
inter	consensusmap	qTL-FS-E3-Chr24	24	FS	0	12.7887	N	91.098	81.6	103.1
inter	consensusmap	STR-C25	25	FS	3.4	7.6	N	51	40	65
inter	consensusmap	q-STR-25-2	25	FS	0	13.48	N	51.5	39.1	71.1
inter	consensusmap	FS25	25	FS	3.43	3.9	N	81.1	78.19	82.15
inter	consensusmap	q-STR-25-1	25	FS	0	14.53	N	98.3	98.2	103.9
inter	consensusmap	Mp7_STR_26_2_8.47_[+]	26	FS	8.5	28	N	50.3	47.2	53.4
inter	consensusmap	q-STR-26-1	26	FS	0	11.32	N	60.6	59.4	60.7
